# Supplementary material
Source: Springer Nature journal article supplement (https://www.springermedizin.de/resource/supplementary/13011_2014_305_MOESM1_ESM.pdf/9628830)

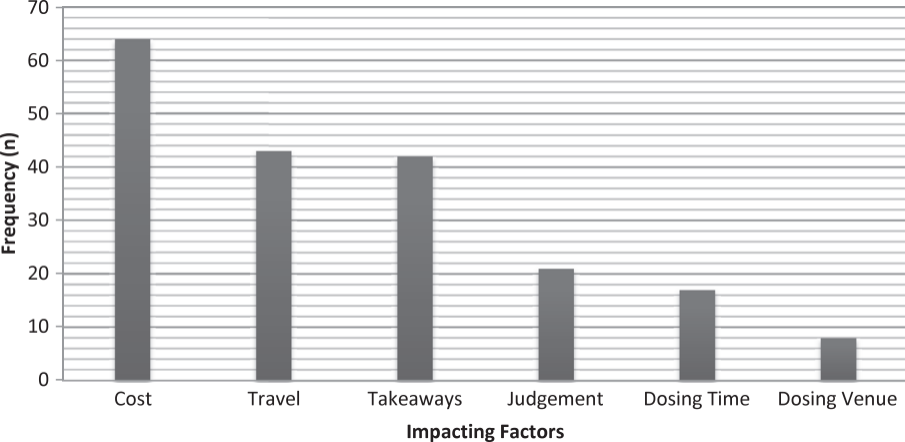

Supplement: MOESM1 [file 9628830]
